# Supplementary material
Source: HighWire-hosted journal article supplement (https://bmjopen.bmj.com/content/7/8/e016756)
Supplement: inline-supplementary-material-1 [file inline-supplementary-material-1.pdf]

## General Information

Reviewer

Date of data extraction

Title of Study

Author(s)

Journal, Vol, Issue, Page nos.

Year

DOI / Article ID

Identified from what source,  
(e.g. Database, reference  
checking of eligible studies,  
forward citation searches of  
eligible studies using Web of  
Science, Journal of the Poor  
and Undeserved, Grey  
literature, Free text searching  
on Google Scholar)

Country of study

Source of funding

Any conflicts of interest?

## Study Characteristics

Study design

Study aims/ objectives/  
research question

Inclusion criteria

Exclusion criteria

Recruitment procedures used  
(e.g. details of randomisation,

blinding)

Unit of allocation (e.g.  
participant, GP practice, etc.)

Start Date

End Date

Duration of participation (from  
recruitment to last follow-up)

What sampling procedure is  
used to select participants?

What form of data collection is  
used?

What form of data analysis is  
used?

What is the overall conclusion  
or recommendations of the  
study?

Does the study directly answer  
the review question? Y/N

What (if any) study limitations  
are declared?

### **Participant characteristics**

Definition of homelessness  
used

Long-term conditions studied

Total number of participants at  
start of study

Information on age of  
participants (e.g. min max  
median mean etc.)

Gender of participants  
(numbers of each)  
Co-morbidities / other health  
conditions  
Ethnicity of participants  
Baseline imbalances

### **Intervention group**

Sample size  
Setting (health-service context)  
Healthcare professional(s)  
involved and role(s)  
Other professional(s) involved?  
Any training required or  
delivered as part of the  
intervention?  
Description of intervention  
Mode of delivery  
Frequency, duration and  
intensity of delivery  
Any theoretical model used to  
underpin or evaluate the  
intervention

### **Comparator group**

Sample size  
Setting (health-service context)  
Healthcare professional(s)  
involved and role(s)

Other professional(s) involved?  
 Comparator (usual care or alternative care)  
 Description of usual/ alternative care  
 Mode of delivery  
 Frequency, duration and intensity of delivery  
 Any theoretical model used to underpin or evaluate the comparator

**Outcomes**

|                                                                                     | Intervention group | Comparator group |
|-------------------------------------------------------------------------------------|--------------------|------------------|
| Number of participants enrolled                                                     |                    |                  |
| Number of participants included in analysis                                         |                    |                  |
| Number of participants who withdrew, were excluded or lost to follow-up and reasons |                    |                  |

Type of analysis used in study (e.g. intention to treat, per protocol):  
 Statistical methods used and appropriateness of these methods, (e.g. adjustment for correlation)

|                                                                                                                     | Information included?<br>Y/N | Definition used in study | Measurement tool or method used | Unit of measurement (if applicable) | Impact of Intervention (95% CI) change from baseline, adjusted or unadjusted |
|---------------------------------------------------------------------------------------------------------------------|------------------------------|--------------------------|---------------------------------|-------------------------------------|------------------------------------------------------------------------------|
| Primary outcomes                                                                                                    |                              |                          |                                 |                                     |                                                                              |
| Hospital admission rate                                                                                             |                              |                          |                                 |                                     |                                                                              |
| A+E attendance rates                                                                                                |                              |                          |                                 |                                     |                                                                              |
| OOH GP usage                                                                                                        |                              |                          |                                 |                                     |                                                                              |
| Emergency GP appointment rates (during normal working hours)                                                        |                              |                          |                                 |                                     |                                                                              |
| Ambulance call outs                                                                                                 |                              |                          |                                 |                                     |                                                                              |
| Secondary outcomes                                                                                                  |                              |                          |                                 |                                     |                                                                              |
| Mortality rates                                                                                                     |                              |                          |                                 |                                     |                                                                              |
| Disease specific marker of disease control, (e.g. HbA1c in Diabetes, BP in Hypertension, Viral load in hepatitis C) |                              |                          |                                 |                                     |                                                                              |
| Engagement in planned healthcare delivery, (e.g. attendance rate at appointments, rate of non-attendance)           |                              |                          |                                 |                                     |                                                                              |
| Concordance to medication/ treatment plan, (e.g. pick-up rate of pharmacy scripts, measured adherence using         |                              |                          |                                 |                                     |                                                                              |

|                                                                                    |  |  |  |  |  |
|------------------------------------------------------------------------------------|--|--|--|--|--|
| validated scores, prescribing)                                                     |  |  |  |  |  |
| Health related Quality of Life                                                     |  |  |  |  |  |
| Behavioural changes<br>(e.g.adherence increased or<br>lifestyle changes initiated) |  |  |  |  |  |
| Patient satisfaction with care                                                     |  |  |  |  |  |
| Cognitive changes, e.g.<br>knowledge of condition                                  |  |  |  |  |  |
| Self efficacy                                                                      |  |  |  |  |  |
| Self esteem                                                                        |  |  |  |  |  |
| Emotional wellbeing                                                                |  |  |  |  |  |
| Depression                                                                         |  |  |  |  |  |
| Anxiety                                                                            |  |  |  |  |  |
| Costs of care                                                                      |  |  |  |  |  |

Any other results reported?  
Further study information  
required? (what and from  
whom)

#### Risk of Bias Assessment

|                            | Risk of Bias<br>Low/ High/<br>Unclear | Support for<br>judgement |
|----------------------------|---------------------------------------|--------------------------|
| Random sequence generation |                                       |                          |
| Allocation concealment     |                                       |                          |

|                                        |  |  |
|----------------------------------------|--|--|
| Blinding of participants and personnel |  |  |
| Similar baseline outcome measurements  |  |  |
| Similar baseline characteristics       |  |  |
| Blinding of outcome assessment         |  |  |
| Incomplete outcome data                |  |  |
| Protection from contamination          |  |  |
| Selective outcome reporting            |  |  |
| Other bias                             |  |  |
